# Supplementary material
Source: HighWire-hosted journal article supplement (doi:10.1101/rna.079972.124)
Supplement: Supplemental_Table_T3.xlsx [file Supplemental_Table_T3.xlsx]

## Sheet: Sheet1
Supplementary table T3 Primers and Antibodies used in this study
Primers used for qRT-PCR analyses
Gene	FW	RV
TFIIb	TGGAGATTTGTCCACCATGA	GAATTGCCAAACTCATCAAAACT
Neat1_1/1_2	TTGGGACAGTGGACGTGTG	TCAAGTGCCAGCAGACAGCA
Neat1_2	GCTCTGGGACCTTCGTGACTCT	CTGCCTTGGCTTGGAAATGTAA
Ucp1	GGCCTCTACGACTCAGTCCA	TAAGCCGGCTGAGATCTTGT
Cox4	TGAGCCTGATTGGCAAGAGA	CGAAGCTCTCGTTAAACTGG
Cidea	CTTATCAGCAAGACTCTGGATG	GAAGGTGACTCTGGCTATTC
Prdm16	GACATTCCAATCCCACCAGA	CACCTCTGTATCCGTCAGCA
Pgc1a	GTGTGGAACTCTCTGGAACT	GCGTACAACTCAGATTGCTC
Elovl3	TCCGCGTTCTCATGTAGGTCT	GGACCTGATGCAACCCTATGA
aP2	AAGACAGCTCCTCCTCGAAGGTT	TGACCAAATCCCCATTTACGC
Eva1	CCACTTCTCCTGAGTTTACAGC	GCATTTTAACCGAACATCTGTCC
Tbx1	GGCAGGCAGACGAATGTTC	TTGTCATCTACGGGCACAAAG
cd137	CGTGCAGAACTCCTGTGATAAC	GTCCACCTATGCTGGAGAAGG
Primers used for preparation of cDNA clones for in situ hybridization
Gene	FW	RV
ppar	CTTGCTGCCCCAAGTGATTTC	TCTGCTTCTGCTTCCTGAACG
pi16	GCTAGGCAGTCCTCTAAGCG	GAGGCGCGTTTAGCGTTTC
Antibodies used in this study
antibody	supplier	catNum
mouse monoclonal anti DIG	Abcam	#ab420
rabbit polyclonal anti FITC	Abcam	#ab19491
anti-rabbit Ucp1	sigma	U6382
anti-rabbit β-actin	GeneTex	GTX109639
anti-mouse TH	CHEMICON	MAB5280
anti-rabbit c-fos	CALBIOCHEM	PC38
anti-mouse Cy3	MerckMillipore	#AP124C
anti-rabbit 488	Invitrogen	A11008
anti-mouse F4/80-APC	BioLegend	#123115
anti-mouse Cd11c-FITC	BD Biosciences	AB_396683
anti-mouse Cd206-perCP/Cy5.5	BioLegend	#141715
Cd140α-APC	BioLegend	#135907
ScaI- perCP/Cy5.5	BioLegend	#301327
Cd34-PE	BioLegend	#128610
Cd31-PE/Cy7	BioLegend	#102523
BAC clones used to prepare DNA FISH probes
locus	clone number
chr5_Tfr2	B6Ng01-205L6
chr5_Epo	B6Ng01-143D1
chr6_4.5SH_1	B6Ng01-245H3
chr6_4.5SH_2	B6Ng01-197C04
chr8_Junb	B6Ng01-162I18
chr10_Gampt	B6Ng01-137K4
chr10_Uqcr11	B6Ng01-301G5
chr11_Fasn	B6Ng01-283P22
chr15_Gpt	B6Ng01-319F22
chr19_Neat1	B6Ng01-78H11
chr19_cox8a	B6Ng01-340H16
